# Supplementary material for: Time-lag of urinary and salivary cortisol response after a psychological stressor in bonobos (Pan paniscus)
Source: PubMed Central journal article supplement (PMC8041877; doi:10.1038/s41598-021-87163-5), 2021-04-12
Supplement: 41598_2021_87163_MOESM1_ESM.pdf [file 41598_2021_87163_MOESM1_ESM.pdf]

## Electronic supplementary material

### Time-lag of urinary and salivary cortisol response after a psychological stressor in bonobos (*Pan paniscus*)

Jonas Verspeek<sup>1,2\*</sup>, Verena Behringer<sup>3,4</sup>, Daan W. Laméris<sup>1,2</sup>, Róisín Murtagh<sup>3</sup>, Marina Salas<sup>2</sup>, Nicky Staes<sup>1,2</sup>, Tobias Deschner<sup>3</sup>, Jeroen M. G. Stevens<sup>1,6</sup>

1 Behavioural Ecology and Ecophysiology Group, Department of Biology, University of Antwerp, Antwerp, Belgium.

2 Antwerp ZOO Centre for Research & Conservation (CRC), Royal Zoological Society of Antwerp (RZSA), Antwerp, Belgium.

3 Max Planck Institute for Evolutionary Anthropology, Interim Group Primatology, Leipzig, Germany

4 Endocrinology Laboratory, German Primate Center, Leibniz Institute for Primate Research, Göttingen, Germany

5 SALTO, Agro- and Biotechnology, Odisee University College, Belgium

\*Corresponding author's e-mail address: [jonas.verspeek@uantwerpen.be](mailto:jonas.verspeek@uantwerpen.be)

**Supplementary Table S1:** Extraction efficiencies of the spiked pool samples of men and women (n = 5)

| Sex   | Spike conc. | Extraction efficiency (%) | Standard deviation |
|-------|-------------|---------------------------|--------------------|
| Men   | Low         | 101.02                    | 3.98               |
|       | High        | 100.45                    | 6.68               |
| Women | Low         | 105.34                    | 5.35               |
|       | High        | 98.20                     | 4.64               |

**Supplementary Table S2:** Coefficient of variation of the extracts (n=5)

|              | Spike conc.       | Cortisol |
|--------------|-------------------|----------|
| Internal std | Low               | 1        |
| Internal std | High              | 6        |
| Male pool    | <i>Not spiked</i> | 6        |
| Female pool  | <i>Not spiked</i> | 2        |
| Male pool    | Low               | 1        |
| Male pool    | High              | 3        |
| Female pool  | Low               | 4        |
| Female pool  | High              | 1        |

**Supplementary Table S3:** Internal standard deviation of the extracts (n = 5)

|        | Spike       | Cortisol-d4 |
|--------|-------------|-------------|
| Male   | <i>None</i> | -43.7       |
| Male   | <i>None</i> | -52.4       |
| Male   | <i>None</i> | -52.7       |
| Male   | <i>None</i> | -54.1       |
| Male   | <i>None</i> | -47.1       |
| Female | <i>None</i> | -49         |
| Female | <i>None</i> | -52.3       |
| Female | <i>None</i> | -45.3       |
| Female | <i>None</i> | -52.8       |
| Female | <i>None</i> | -50.1       |
| Male   | Low         | -52.3       |
| Male   | Low         | -47.9       |
| Male   | Low         | -47.5       |
| Male   | Low         | -51.3       |
| Male   | Low         | -48.5       |
| Male   | High        | -51.6       |
| Male   | High        | -51.4       |
| Male   | High        | -44.3       |
| Male   | High        | -48.1       |
| Male   | High        | -44.6       |
| Female | Low         | -49.6       |
| Female | Low         | -51.2       |
| Female | Low         | -52.3       |
| Female | Low         | -51.2       |
| Female | Low         | -42.2       |
| Female | High        | -44.5       |
| Female | High        | -44.3       |
| Female | High        | -51.1       |
| Female | High        | -53.3       |
| Female | High        | -43.6       |
